# Supplementary material for: Environmental and biological controls on Na∕Ca ratios in scleractinian cold-water corals
Source: Copernicus journal article supplement (doi:10.5194/bg-16-3565-2019), 2019-09-20
Supplement: Supplementary file 1 [file bg-16-3565-2019-supplement.pdf]

Supplement of Biogeosciences, 16, 3565–3582, 2019  
<https://doi.org/10.5194/bg-16-3565-2019-supplement>  
© Author(s) 2019. This work is distributed under  
the Creative Commons Attribution 4.0 License.

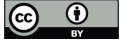

*Supplement of*

## **Environmental and biological controls on Na / Ca ratios in scleractinian cold-water corals**

**Nicolai Schleinkofer et al.**

*Correspondence to:* Nicolai Schleinkofer ([schleinkofer@em.uni-frankfurt.de](mailto:schleinkofer@em.uni-frankfurt.de))

The copyright of individual parts of the supplement might differ from the CC BY 4.0 License.

| Samplename | Location                                          | Coordinates                | Waterdepth [m] | Temperature [°C] | Salinity [PSU] | pH   | Reference                                         |
|------------|---------------------------------------------------|----------------------------|----------------|------------------|----------------|------|---------------------------------------------------|
| A1 - A4    | Traenadjupet, Norwegian Sea                       | 66°58.400'N<br>11°06.529'E | 300            | 7.2              | 35.2           | 8.02 | Dullo et al. (2008), Rüggeberg et al. (2011)      |
| B1 - B2    | Whittard Canyon, Celtic Sea                       | 48°46.79'N<br>10°34.20'W   | 835            | 9.79             | 35.5           | 7.99 | Raddatz et al. (2013)                             |
| C1 - C2    | Stjernesund Fjord, Norwegian Sea                  | 70°16.04'N<br>22°27.37'E   | 295            | 5.9              | 35             | 8.20 | Rüggeberg et al. (2011)                           |
| D1 - D4    | Little Galway Mound, Belgica Mound Province       | 51°26.51'N<br>11°45.43'W   | 881            | 8.96             | 35.53          | 7.99 | Dullo et al. (2008), Rüggeberg et al. (2011)      |
| E1 - E3    | Santa Maria di Leuca, Ionic Sea                   | 39°125.00'N<br>18°127.00'E | 560-750        | 13.66            | 38.66          | 8.08 | Flögel et al. (2014)                              |
| F1 - F4    | Guilvinec Canyon, Bay of Biscay                   | 46°56.20'N<br>5°21.60'W    | 800            | 10.29            | 35.6           | 8.08 | Raddatz et al. (2013)                             |
| G1 - G4    | Sotbakken, Norwegian Sea                          | 70°45.35'N<br>18°40.04'E   | 265            | 6.6              | 35.2           | 8.06 | Raddatz et al. (2013)                             |
| H1 - H3    | Galway Mound, Belgica Mound Province              | 51°26.94'N<br>11°45.16'E   | 837            | 9.54             | 35.53          | 7.99 | Dullo et al. (2008), Rüggeberg et al. (2011)      |
| I1 - I3    | Urania Bank, Strait of Sicily                     | 36°50.32'N<br>13°09.35'E   | 559            | 13.5             | 38.8           | 8.11 | Raddatz et al. (2013), López Correa et al. (2010) |
| J1 - J2    | Meknes Carbonate Mound Provincence, Gulf of Cadiz | 34.59.98'N<br>7°04.51'W    | 738            | 10.28            | 35.7           | 7.76 | Raddatz et al. (2013)                             |
| K1 - K5    | Trondheimfjord, Norwegian Sea                     | 63°28.61'N<br>9°59.72'E    | 240            | 8.1              | 31.2           | 8.03 | Dullo et al. (2008), Rüggeberg et al. (2011)      |
| LO1        | Bari Canyon, Adriatic Sea                         | 41°18.00'N<br>17°12.00'E   | 315-650        | 13.49            | 38.62          | 8.08 | Flögel et al. (2014)                              |
| MSS1       | Santa Maria di Leuca, Ionic Sea                   | 39°25.00'N<br>18°27.00'E   | 560-750        | 13.66            | 38.66          | 8.08 | Flögel et al. (2014)                              |

|      |                                                     |                            |         |       |        |      |                                                                   |
|------|-----------------------------------------------------|----------------------------|---------|-------|--------|------|-------------------------------------------------------------------|
| MA1  | Bari Canyon,<br>Adriatic Sea                        | 41°18.00'N<br>17°12.00'E   | 315–650 | 13.49 | 38.62  | 8.08 | Flögel et al.<br>(2014)                                           |
| MSM1 | Campeche Bank, Gulf<br>of Mexico                    | 23°50.121'N<br>87°10.484'W | 565     | 10.59 | 35.24  | 7.94 | WOA<br>2013(Locarnini<br>et al., 2013;<br>Zweng et al.,<br>2013)  |
| MSM2 | Great Bahama Bank<br>Mound E,<br>Northwest Atlantic | 24°35.623'N<br>79°16.808'W | 579     | 9.24  | 35.084 | 7.94 | WOA 2013<br>(Locarnini et<br>al., 2013;<br>Zweng et al.,<br>2013) |
| MSM3 | Great Bahama Bank<br>Mound B,<br>Northwest Atlantic | 24°33.848'N<br>79°19.811'W | 616     | 9.27  | 35.1   | 7.94 | WOA 2013<br>(Locarnini et<br>al., 2013;<br>Zweng et al.,<br>2013) |
| MSM4 | Southwest Florida,<br>Gulf of Mexico                | 24°58.164'N<br>84°17.973'W | 483     | 8.29  | 35.17  | 7.85 | WOA 2013<br>(Locarnini et<br>al., 2013;<br>Zweng et al.,<br>2013) |
| ALB1 | El Idrissi Bank,<br>Alboran Sea                     | 36°06.31'N<br>3°29.33'W    | 647     | 12.98 | 38.464 | 8.06 | WOA 2013<br>(Locarnini et<br>al., 2013;<br>Zweng et al.,<br>2013) |
| KRS1 | Northeastern Red Sea                                | 27°42.306'N<br>35°09.046'E | 954     | 21.66 | 40.55  | 7.94 | WOA 2013<br>(Locarnini et<br>al., 2013;<br>Zweng et al.,<br>2013) |
| KRS2 | Northeastern Red Sea                                | 22°17.857'N<br>38°53.648'E | 580     | 21.66 | 40.55  | 7.94 | WOA 2013<br>(Locarnini et<br>al., 2013;<br>Zweng et al.,<br>2013) |
| KRS3 | Northeastern Red Sea                                | 27°42.306'N<br>35°09.046'E | 954     | 21.66 | 40.55  | 7.94 | WOA 2013<br>(Locarnini et<br>al., 2013;<br>Zweng et al.,<br>2013) |
| KRS4 | Northeastern Red Sea                                | 27°42.306'N<br>35°09.046'E | 954     | 21.66 | 40.55  | 7.94 | WOA 2013<br>(Locarnini et<br>al., 2013;<br>Zweng et al.,<br>2013) |
| KRS5 | Northeastern Red Sea                                | 22°46.149'N<br>38°02.944'E | 625     | 21.66 | 40.55  | 7.94 | WOA 2013<br>(Locarnini et<br>al., 2013;<br>Zweng et al.,<br>2013) |

|                    |                                     |                          |     |     |      |      |                                                       |
|--------------------|-------------------------------------|--------------------------|-----|-----|------|------|-------------------------------------------------------|
| L10-1              | Tautra Reef,<br>Norwegian Sea       | 63°35.36'N<br>10°31.23'E | 39  | 6   | 30.1 | 7.99 | Neulinger<br>(2008)                                   |
| L2-1 – L2-2        | Lopphavet,<br>Norwegian Sea         | 70°26.80'N<br>21°10.38'E | 230 | 6.5 | 35.1 | 8.06 | Raddatz et al.<br>(2013)                              |
| L3-1 – L3-2        | Lopphavet, Norwegian<br>Sea         | 70°26.80'N<br>21°10.38'E | 230 | 6.5 | 35.1 | 8.06 | Raddatz et al.<br>(2013)                              |
| L5-1 – L5-2        | Stjernesund Fjord,<br>Norwegian Sea | 70°16.04'N<br>22°27.37'E | 295 | 5.9 | 35   | 8.20 | Rüggeberg et<br>al. (2011)                            |
| L6-1 – L6-2        | Sula Reef,<br>Norwegian Sea         | 64°05.93'N<br>8°05.47'E  | 286 | 7.6 | 35.3 | 8.08 | Raddatz et al.<br>(2013)                              |
| L7-1 – L7-2        | Sula Reef,<br>Norwegian Sea         | 64°05.93'N<br>8°05.47'E  | 286 | 7.6 | 35.3 | 8.08 | Raddatz et al.<br>(2013)                              |
| L8-1 – L8-2        | Nordleksa,<br>Norwegian Sea         | 63°36.43'N<br>9°22.66'E  | 155 | 7.8 | 35   | 8.03 | Form et al.<br>(2014)                                 |
| LR1 – LR6          | Lopphavet,<br>Norwegian Sea         | 70°26.59'N<br>21°10.00'E | 230 | 6.5 | 35.1 | 8.05 | Raddatz et al.<br>(2013)                              |
| LW1 – LW5          | Lopphavet,<br>Norwegian Sea         | 70°26.59'N<br>21°10.00'E | 230 | 6.5 | 35.1 | 8.05 | Raddatz et al.<br>(2013)                              |
| NL-1 – NL6         | Nordleksa,<br>Norwegian Sea         | 63°36.43'N<br>9°22.66'E  | 155 | 7.8 | 35   | 8.03 | Form et al.<br>(2014)                                 |
| OS1 – OS6          | Oslo Fjord,<br>North Sea            | 59°04.01'N<br>10°44.31'E | 115 | 8.2 | 35.2 | 7.98 | Raddatz et al.<br>(2013)                              |
| P391-1 –<br>P391-3 | Lopphavet,<br>Norwegian Sea         | 70°26.59'N<br>21°10.00'E | 230 | 6.5 | 35.1 | 8.05 | Raddatz et al.<br>(2013)                              |
| RL1-1 – RL1-<br>4  | Trondheimfjord,<br>Norwegian Sea    | 63°28.61'N<br>9°59.72'E  | 240 | 8.1 | 31.2 | 8.03 | Dullo et al.<br>(2008),<br>Rüggeberg et<br>al. (2011) |
| RL4-1 – RL4-<br>4  | Trondheimfjord,<br>Norwegian Sea    | 63°28.61'N<br>9°59.72'E  | 240 | 8.1 | 31.2 | 8.03 | Dullo et al.<br>(2008),<br>Rüggeberg et<br>al. (2011) |

|               |                                  |                          |     |     |      |      |                                              |
|---------------|----------------------------------|--------------------------|-----|-----|------|------|----------------------------------------------|
| RL9-1 – RL9-5 | Trondheimfjord, Norwegian Sea    | 63°28.61'N<br>9°59.72'E  | 240 | 8.1 | 31.2 | 8.03 | Dullo et al. (2008), Rüggeberg et al. (2011) |
| SJ1 – SJ6     | Stjernesund Fjord, Norwegian Sea | 70°16.04'N<br>22°27.37'E | 295 | 5.9 | 35   | 8.20 | Rüggeberg et al. (2011)                      |
| SJ2-1 – SJ2-4 | Stjernesund Fjord, Norwegian Sea | 70°16.04'N<br>22°27.37'E | 295 | 5.9 | 35   | 8.20 | Rüggeberg et al. (2011)                      |
| TF1 – TF2     | Tautra Reef, Norwegian Sea       | 63°35.36'N<br>10°31.23'E | 39  | 6   | 30.1 | 7.99 | Neulinger (2008)                             |
| TF2-1 – TF2-6 | Trondheimfjord, Norwegian Sea    | 63°28.61'N<br>9°59.72'E  | 240 | 8.1 | 31.2 | 7.99 | Dullo et al. (2008), Rüggeberg et al. (2011) |
| EFC1 – EFC6   | Sula Reef, Norwegian Sea         | 64°05.93'N<br>8°05.47'E  | 286 | 7.6 | 35.3 | 8.03 | Raddatz et al. (2013)                        |
| EFE1 – EFE4   | Sula Reef, Norwegian Sea         | 64°05.93'N<br>8°05.47'E  | 286 | 7.6 | 35.3 | 8.08 | Raddatz et al. (2013)                        |

**Table S1 Sample ident and location Metadata. Sample names such as A1-A4 relate to multiple samples that derive from the same coral specimen/calice.**

| Samplename | Species | Na/Ca<br>[mmol/mol] | Mg/Ca<br>[mmol/mol] | Sr/Ca<br>[mmol/mol] |
|------------|---------|---------------------|---------------------|---------------------|
| A1 - A4    | D       | 29.02               | 3.83                | 10.23               |
| B1 - B2    | D       | 24.87               | 3.17                | 9.91                |
| C1 - C2    | D       | 29.25               | 3.97                | 9.95                |
| D1 - D4    | D       | 27.57               | 3.94                | 10.01               |
| E1 - E3    | D       | 24.14               | 4.03                | 9.84                |
| F1 - F4    | D       | 24.61               | 3.56                | 10.05               |
| G1 - G4    | D       | 31.04               | 4.25                | 10.18               |
| H1 - H3    | D       | 23.93               | 3.62                | 10.21               |
| I1 - I3    | D       | 23.75               | 3.99                | 9.65                |
| J1 - J2    | D       | 21.2                | 2.45                | 10.35               |
| K1 - K5    | D       | 28.72               | 7.84                | 9.6                 |
| LO1        | D       | 26.74               | 3.94                | 10                  |
| MSS1       | D       | 26.85               | 5.41                | 10.03               |

|      |   |       |      |       |
|------|---|-------|------|-------|
| MA1  | M | 25.18 | 3.73 | 10.47 |
| MSM1 | D | 66.24 | 7.71 | 10.31 |
| MSM2 | D | 30.17 | 6.38 | 10.42 |
| MSM3 | M | 56.92 | 9.98 | 10.62 |
| MSM4 | D | 25.43 | 3.04 | 10.22 |
| ALB1 | D | 49.9  | 3.82 | 10.08 |
| KRS1 | C | 45.84 | 4.37 | 9.94  |
| KRS2 | C | 22.33 | 4.47 | 10.15 |
| KRS3 | C | 20.91 | 4.73 | 9.46  |
| KRS4 | C | 20.49 | 2.81 | 9.78  |
| KRS5 | C | 20.78 | 3.49 | 10.36 |

|                    |   |       |      |       |
|--------------------|---|-------|------|-------|
| L10-1              | D | 21.12 | 2.2  | 10    |
| L2-1 – L2-2        | D | 24.61 | 3.04 | 10.11 |
| L3-1 – L3-2        | D | 24.58 | 3.19 | 10.36 |
| L5-1 – L5-2        | D | 23.43 | 3.1  | 10.39 |
| L6-1 – L6-2        | D | 23.79 | 3.68 | 10.26 |
| L7-1 – L7-2        | D | 25.45 | 3.49 | 10.41 |
| L8-1 – L8-2        | D | 23.67 | 3.23 | 10.21 |
| LR1 – LR6          | D | 27.18 | 3.34 | 10.31 |
| LW1 – LW5          | D | 26.23 | 3.79 | 9.63  |
| NL-1 – NL6         | D | 28.14 | 4.67 | 9.9   |
| OS1 – OS6          | D | 24.81 | 5.73 | 9.7   |
| P391-1 –<br>P391-3 | D | 24.45 | 6.26 | 10.38 |
| RL1-1 – RL1-4      | D | 21.32 | 3.03 | 10.27 |
| RL4-1 – RL4-4      | D | 24.36 | 4.72 | 10.38 |



|               |   |       |      |       |
|---------------|---|-------|------|-------|
| RL9-1 – RL9-5 | D | 22.68 | 3.41 | 10.26 |
| SJ1 – SJ6     | D | 28.64 | 4.51 | 10.07 |
| SJ2-1 – SJ2-4 | D | 29.38 | 5.37 | 10.42 |
| TF1 – TF2     | D | 25.72 | 6.1  | 10.13 |
| TF2-1 – TF2-6 | D | 21.42 | 3.78 | 10.2  |
| EFC1 – EFC6   | D | 26.01 | 4.31 | 9.94  |
| EFE1 – EFE4   | D | 27.1  | 3.8  | 10.31 |

Table S2 Results of the ICP-OES measurements. Red values are identified as outliers and are not considered for further calculations. Species abbreviations stand for D = *Desmophyllum pertusum*, M = *Madrepora oculata* and C = Caryophylliid species. Sample names such as A1-A4 relate to multiple samples that derive from the same coral specimen/calice.

## Reference list

- Dullo, W. C., Flögel, S. and Rüggeberg, A.: Cold-water coral growth in relation to the hydrography of the Celtic and Nordic European continental margin, *Mar. Ecol. Prog. Ser.*, 371, 165–176, doi:10.3354/meps07623, 2008.
- Flögel, S., Dullo, W. C., Pfannkuche, O., Kiriakoulakis, K. and Rüggeberg, A.: Geochemical and physical constraints for the occurrence of living cold-water corals, *Deep. Res. Part II Top. Stud. Oceanogr.*, 99, 19–26, doi:10.1016/j.dsr2.2013.06.006, 2014.
- Form, A. U., Büscher, J., Hissmann, K., Flögel, S., Wisshak, M., Rüggeberg, A., Hennige, S., Bennecke, S., Bannister, R., Schauer, J. and Fenske, M.: RV POSEIDON Cruise Report POS455 LORELEI Lophelia REef Lander Expedition and Investigation, Bremerhaven - (Kristiansund) - Kiel, 24.06. - (12.07.) - 17.07.2013, GEOMAR Helmholtz-Zentrum für Ozeanforschung, Kiel., 2014.
- Locarnini, R. A., Mishonov, A. V., Antonov, J. I., Boyer, T. P., Garcia, H. E., Baranova, O. K., Zweng, M. M., Paver, C. R., Reagan, J. R., Johnson, D. R., Hamilton, M., Seidov 1948-, D. and Levitus, S.: World ocean atlas 2013. Volume 1, Temperature, edited by O. C. L. National Oceanographic Data Center (U.S.) and N. E. S. United States Data, and Information Service, , doi:http://doi.org/10.7289/V55X26VD, 2013.
- López Correa, M., Montagna, P., Vendrell-Simón, B., McCulloch, M. and Taviani, M.: Stable isotopes ( $\delta^{18}\text{O}$  and  $\delta^{13}\text{C}$ ), trace and minor element compositions of Recent scleractinians and Last Glacial bivalves at the Santa Maria di Leuca deep-water coral province, Ionian Sea, *Deep. Res. Part II Top. Stud. Oceanogr.*, 57(5–6), 471–486, doi:10.1016/j.dsr2.2009.08.016, 2010.
- Neulinger, S. C., Järnegren, J., Ludvigsen, M., Lochte, K. and Dullo, W. C.: Phenotype-specific bacterial communities in the cold-water coral *Lophelia pertusa* (Scleractinia) and their implications for the coral's nutrition, health, and distribution, *Appl. Environ. Microbiol.*, 74(23), 7272–7285, doi:10.1128/AEM.01777-08, 2008.
- Raddatz, J., Liebetrau, V., Rüggeberg, A., Hathorne, E., Krabbenhöft, A., Eisenhauer, A., Böhm, F., Vollstaedt, H., Fietzke, J., Correa, M. L., Freiwald, A. and Dullo, W.: Stable Sr-isotope, Sr / Ca, Mg / Ca, Li / Ca and Mg / Li ratios in the scleractinian cold-water coral *Lophelia pertusa*, *Chem. Geol.*, 352, 143–152, doi:10.1016/j.chemgeo.2013.06.013, 2013.
- Rüggeberg, A., Flögel, S., Dullo, W. C., Hissmann, K. and Freiwald, A.: Water mass characteristics and sill dynamics in a subpolar cold-water coral reef setting at Stjærnsund, northern Norway, *Mar. Geol.*, 282(1–2), 5–12, doi:10.1016/j.margeo.2010.05.009, 2011.
- Zweng, M. M., Reagan, J. R., Antonov, J. I., Locarnini, R. A., Mishonov, A. V., Boyer, T. P., Garcia, H. E., Baranova, O. K., Johnson, D. R., Seidov 1948-, D., Biddle, M. M. and Levitus, S.: World ocean atlas 2013. Volume 2, Salinity, edited by O. C. L. National Oceanographic Data Center (U.S.) and N. E. S. United States Data, and Information Service, , doi:http://doi.org/10.7289/V5251G4D, 2013.
